# Supplementary material
Source: PubMed Central journal article supplement (PMC4308560)
Supplement: NIHMS634160-supplement-01.pdf [file NIHMS634160-supplement-01.pdf]

Table 4, online. Results of bootstrapping analyses for effects of perceived discrimination on CESD scores among non-Hispanic white young adults from the Princeton School District (PSD) Study (N=296)

|                                                                                | <b>Effect Estimate</b> | <b>95% CI</b> |       |
|--------------------------------------------------------------------------------|------------------------|---------------|-------|
| Parent education direct effect                                                 | -1.30                  | -2.50         | -0.10 |
| Discrimination mediated                                                        | -0.42                  | -0.89         | -0.14 |
| Proportion of parent education indirect effect accounted for by discrimination |                        | 32.3          |       |
| Model adjusted R <sup>2</sup>                                                  | 0.17                   |               |       |

Model adjusts for sex, household income, baseline age, and length of follow up.
